# Supplementary material
Source: Springer Nature journal article supplement (https://www.springermedizin.de/resource/supplementary/13058_2011_2931_MOESM5_ESM.pdf/9702916)

**A**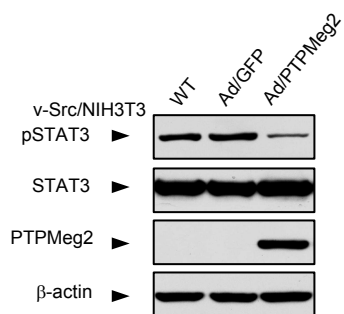**B**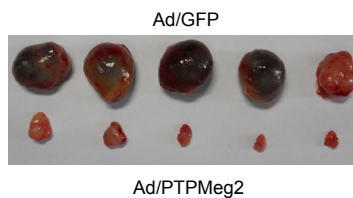**C**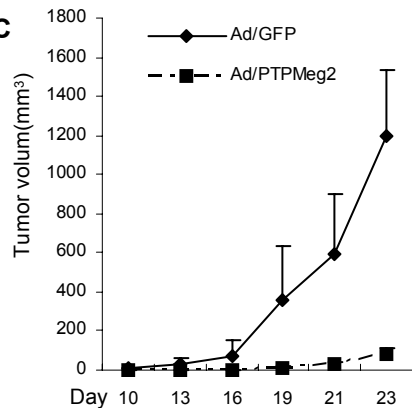**D**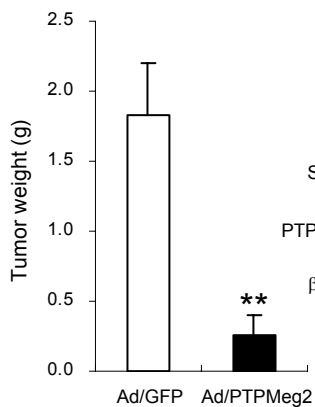**E**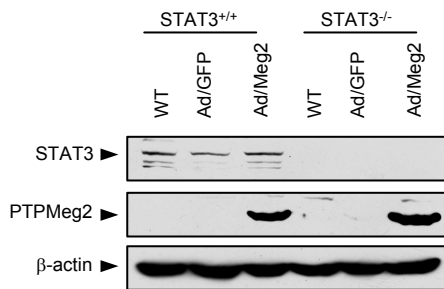**F**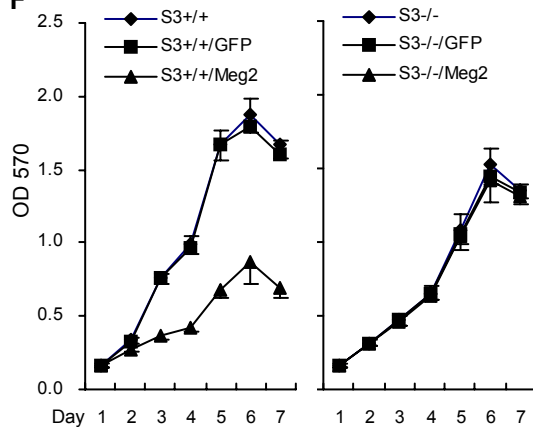**G**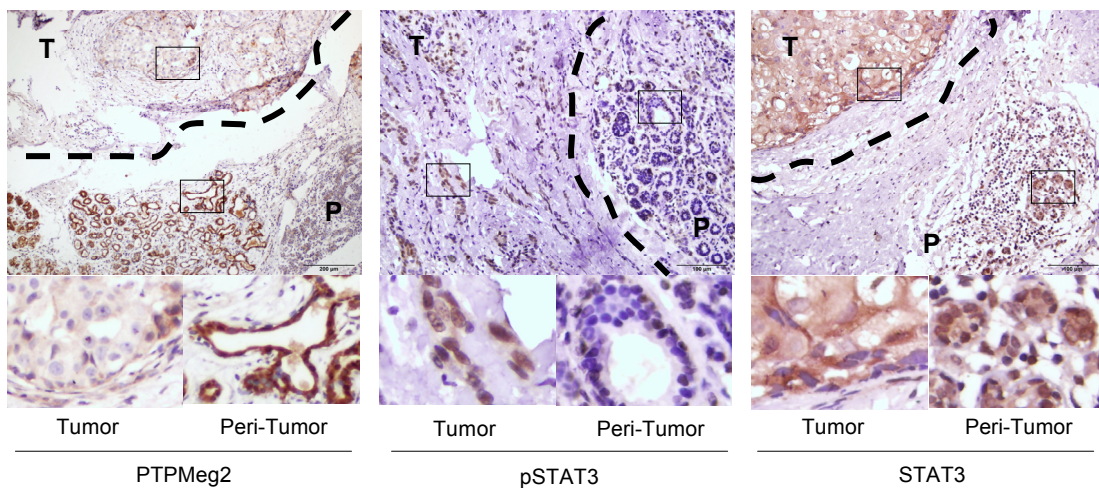

Supplement: MOESM5 [file 9702916]
